# Supplementary material for: The interaction of Solar Radiation Modification and Earth System Tipping Elements
Source: Copernicus journal article supplement (doi:10.5194/egusphere-2023-1753), 2023-10-10
Supplement: Supplementary file [file egusphere-2023-1753-AC2-supplement.pdf]

## Reviewer 2

***We thank the reviewer for the helpful comments. The reviewers comments are in grey, whilst our responses are in black and italicised***

Paper summary:

In this paper, the authors present a review of scientific literature around the potential for solar radiation modification (SRM) to prevent tipping points (TPs) in the Earth system, and in particular climate tipping points (CTPs). While the risks posed by CTPs have been suggested as a motivation for considering SRM, studies on the specifics of how SRM might interact with tipping dynamics in parts of the climate system liable to tip (i.e. tipping elements/systems) have only recently started to be undertaken. In many cases no such specific studies exist, although more general research on how SRM affects feedbacks involved in tipping might be available instead. The authors collate direct or indirect studies relating to potential SRM impacts on tipping systems and their ability to mitigate CTPs, covering commonly proposed tipping systems in the cryosphere, ocean, atmosphere, and biosphere. They then assess whether the collated evidence supports SRM being able to prevent tipping in those systems to some extent, as well as whether tipping can be countered once in progress. They find that while many systems have some evidence that tipping drivers can be partly compensated for using SRM, confidence is generally low and research is currently lacking in many areas, for which future research avenues are suggested for improved study scenarios and models.

***We would like to thank the reviewer for this very accurate summary of our work***

General comments:

In general this is a timely paper, given increasing attention on the risks posed by climate tipping points and proposals that this necessitates SRM, but only a small (but recently growing) pool of targeted research in this area. Reviewing current literature and identifying gaps to target with further research is therefore a welcome exercise that will hopefully spur on more research in this area, and easily falls within the scope of this journal.

***We thank the reviewer for their confidence in the topic of the paper.***

Tipping systems and their hypothesised dynamics are in general accurately portrayed, though in places could variously do with more detail or being more concise (see specific comments for details). There are some places too where the latest papers should be included (e.g. on Antarctica) as the pace is picking up in this field now with some relevant papers published since submission. In several places tighter writing, reducing repetition, and more consistent structuring would help improve flow, which would also make the paper more concise (it's not overly long at present, but ideally it shouldn't get longer, and shorter is preferable for readability if possible).

*We have attempted to add these paper and tighten up the paper, and hope in this regards it is improved. We have also made the paper more concise, by shortening some sections, and by removing the section on Dipterocarp Forests.*

It's good to have put SRM discourse in context upfront, and the complexities around SRM not cancelling out all climate change as easily as GMST. However, I think there could be more discussion of how applying SRM in ESMs (particularly for slightly older SRM studies) that lack key tipping-relevant processes and feedbacks means we may be missing some key SRM-CTP interactions, such as the effects of SRM-induced precipitation or ecological changes. For example, ESMs are likely biased towards AMOC stability (per IPCC), lack spatial heterogeneity in ecohydrological dynamics in the Amazon (where many ESMs disagree on even sign of precip change too), or lack abrupt thaw or interactions with surface vegetation in permafrost. In some cases this could offset part of the SRM compensation of tipping, and in some cases potentially even worsen tipping risk (e.g. that one study shows worsening of Amazon droughts with SRM vs. emission scenario without SRM). To me this means the conclusion in the abstract that "*We find that SRM mostly reduces the risk of hitting tipping points relative to same emission pathway scenarios without SRM*" needs additional clarification that this is mostly relative to temperature, with other climatic factors that are not so well understood likely complicating and potentially undermining this risk reduction.

*We thank the reviewer for the useful stressing of this, and agree that this is not clarified enough upfront. To this end, we have made a number of changes. Firstly, uncertainty has now been stressed in the abstract after this conclusion, with words to the following effect: Where temperature is the key driver (which is the case for a large number of tipping elements), we find that SRM mostly reduces the risk of hitting tipping points relative to same emission pathway scenarios without SRM. Nonetheless, deep uncertainties remain, particularly when drivers less strongly coupled to temperature are important. Considerably more modelling is necessary before many of these uncertainties are resolved.*

*Secondly, we have added a figure (mentioned in our response to reviewer 1), putting each of the tipping elements on a map, and stressing our overall judgement of the impact of SRM on that tipping element, and a visual representation of our uncertainty prominently alongside this. Furthermore, we have now edited the table so it includes a statement of our uncertainty on the impact of SRM on each individual driver (by highlighting the range of possible effects), and importantly now has a column dedicated to the 'strength of evidence base' where we discuss the uncertainty around the evidence. In response to reviewer 1, the table is earlier in the paper and much more prominent, and so the statement of our uncertainty is as well.*

*Thirdly, we have stressed this more in the introduction and the discussion.*

Beyond the often discussed biospheric tipping systems of Amazon rainforest, boreal forests, and warm-water coral reefs, the authors also select dipterocarp forests in

Southeast Asia and various ecosystems in South Asia as potential tipping systems. However, for some examples such as dipterocarp forests, eastern Himalayas, or the Western Ghats their potential for self-sustaining regime shifts is not currently clear from the presented evidence. Additionally, it's not clear why for example the Sundarbans are highlighted but not the mangrove biome more widely, or why other biomes like savannahs/grasslands or non-coral ocean ecosystems aren't analysed. If this is because these are not covered by existing studies then that's OK but should be made clear, otherwise it seems a few examples of highly biodiverse ecosystems have been picked and the possibility of tipping in them speculated. I suggest being clearer on reasons for inclusion and their potential tipping dynamics, or adjusting review framing to be explicitly about whether SRM can prevent tipping dynamics plus biodiversity loss in some selected examples. The latter could be a whole other (and interesting) paper though, so I would suggest focusing on where tipping dynamics can be shown to be possible or likely.

*The section on parts of the Indian Subcontinent has been rewritten (see response to Reviewer 1) and renamed the Himalaya-to-Sundarbans (HTS) Hydro-ecological System, to emphasize that this is a single, integrated system from the Himalayan glaciers to the Sundarbans in the Bay of Bengal. The HTS system well qualifies as a (very uncertain) example of regional impact tipping element, following the same rationale behind defining low-latitude coral reefs as regional impact tipping element in Armstrong McKay 2022, That is, they both have significant human but indirect/regional impacts (please see the response posted to Reviewer 1 for more details). Because the natural and human systems within the HTS are interconnected by water and temperature, they are highly vulnerable to climate change induced tipping points, and to SRM potentially pulling them back from tipping points or leading to unpredicted state changes. However, while highly plausible, there is little data to support this whole system perspective, because this enormous system is greatly understudied as a unified system vulnerable to climate tipping points. We think that making this point may possibly result in greater attention, particularly given the proposed significance that some has suggested for the states on the Indian Subcontinent in shaping the future of SRM (as envisioned, for example, in Stanley Robinson (2020) and scenario work that one of us (Futerman) carried out in 2022-23). We think that a single section at this point, given the dearth of data, may be sufficient to stimulate more work on this, but it is probably insufficient for an entire paper.*

*The relevance of the Sundarbans system to other mangrove forests has now been added, but it is not just a random example. As the largest mangrove system in the world, and arguably the most biodiverse, it is worth bringing attention to this specific understudied and underrecognized system, and given space constraints, we chose for this to be the mangrove system example we use. It is now discussed in the context of the larger system of which it is an integral part.*

*We agree that grasslands/savannahs and other ecological systems are vulnerable to climate change and land use change induced tipping points and that understanding the potential of SRM to exacerbate or ameliorate climate tipping in these systems is important! But we had to stop somewhere, so, we chose some very familiar and*

*well-studied systems, and a less-familiar one to stimulate thinking, awareness, and hopefully further study.*

Specific comments:

Line no.

12-13: Is preventing CTPs considered a key benefit of SRM that often in literature? My reading of literature is that it has increasingly been suggested in some papers/proposals, but I'm not sure preventing CTPs is so often made central yet.

*It is true that it is not central, although it is being increasingly suggested. This has been amended to reflect this fact.*

16: SAI not yet defined.

*This has now been changed*

20-22: Given the large uncertainties include non-temperature factors such as precipitation changes potentially countering or even cancel out tipping-compensation by SRM (particularly for biosphere, where hydrological effects makes SRM very uncertain and e.g. some experiments show worsening of Amazon droughts with SRM), I think this statement could do with some clarification. To me, this review shows that while direct SRM-CTP studies are few or missing for many systems, where studies have been done it appears SRM can reduce tipping risk specifically with respect to regional or global temperature (with high uncertainties), but current model limitations mean SRM's influence on tipping dynamics via other climatic factors could reduce or even nullify risk reductions.

*We agree with the reviewer, and thank him for this clarification. As mentioned, we have edited this to better clarify and foreground the uncertainties. With respect to the last statement the reviewer makes, it is important that we apply the implication of uncertainty symmetrically; just as the high uncertainty due to our poor quality of evidence could mean that the risk reductions from SRM are reduced or nullified, it also could mean they are enhanced. Moreover, whilst we agree with the reviewer that there do exist tipping points where this could be the case (or at least it is possible this is the case), for the majority of tipping points, SRM doesn't seem likely to push any key driver in the 'worsen' direction when compared to anthropogenic climate change. So whilst reducing risk reductions from the temperature effect seems plausible, for most elements nullification seems unlikely (of course, if SRM is only partially effective, it may remain easy for human impacts to tip the tipping elements, even if SRM made such tipping harder).*

29: AM22 is specifically about climate TPs rather than wider Earth system TPs, which is likely the case here too given regional/global temperature trigger focus.

*Whilst we do mostly focus on climate tipping elements, the hope was to expand this slightly to some of the biosphere tipping elements that, whilst having climatic drivers, may or may not even mainly be driven by climatic factors. Whilst AM22 does deal with*

*the biosphere, we hoped to explicitly treat the biosphere in its own terms, rather than solely as a CTP.*

50: I think self-sustaining or self-perpetuating is more accurate - the changes can be quite steady for a long time rather than accelerating in some cases (e.g. ice sheet collapse).

*This has been amended.*

55: Is the TP here the extinction itself or events leading to it as TP? I'm not sure the former could be seen as a TP, more a general threshold response, as there's no clear self-sustaining change dynamic there (beyond maybe a population bottleneck / functional extinction effect in final stages). Extinction can certainly lead to ecosystem regime shifts though, which can be a TP if the regime shift is self-sustaining in some regard (e.g. such that hysteresis occurs).

*The reviewer is correct that it is the rapid population loss preceding extinction (beyond which extinction may be near inevitable) that is generally considered the tipping point, as per Osmond and Klausmeier (2017). This study does highlight that such rapid population loss has been considered a tipping point in the ecological/evolutionary literature. Of course, the scale of these tipping points is much smaller than what we are concerned with, and we simply wished to note this discrepancy between the broader understanding of TPs in the ecological literature with the use of it in the climate literature. The wording of the section has been amended to highlight this. Of course, extinction could also precipitate tipping as well.*

73-75: This is a key point (along with e.g. lines 143-146), and links to my hesitation elsewhere about confidence in SRM's compensation for CTPs being somewhat temperature-centric.

*We agree with the reviewer here. We also hope the visual uncertainty representation that will be in the figure (containing a world map) will help to foreground this uncertainty.*

79: A more specific reference here for tipping overshoot would be Ritchie et al (2021) [<https://www.nature.com/articles/s41586-021-03263-2>].

This has been added.

105-107: Good to have put SRM in wider context upfront.

*Thank you for this remark.*

113-114: Presumably there's not so much research out there for attempts at regional cooling.

*These do exist, including the recent regional marine cloud brightening study (<https://doi.org/10.1029/2023GL104314>) which we now briefly discuss at around this point in the paper; however, we chose to mostly focus on global SRM deployment schemes as these are the more commonly discussed.*

115: Is "resembling" here these references, or is this a sentence fragment?

*This is related to the references; the brackets have been changed to make this clear*

183: "Greenland Ice Sheet " would be clearer than "Greenland tipping element".

*This has been edited*

200-203: I think this would be better rearranged so explanation of rebound comes first.

*We have rearranged this paragraph to explain rebound before going on to explain how it may counteract surface lowering.*

208-210: I suspect the ice sheet components in the models likely used for these studies were lacking in terms of representing enough ice sheet dynamics to capture tipping, which is a limitation (and taps in to my general comment that SRM studies using ESMs that lack key tipping dynamics won't be getting the full picture of how SRM effects tipping dynamics).

*Yes, most of these studies use simple ice sheet models. Irvine et al 2009 use a fully coupled AOGCM for the climate scenarios, but the ice sheet model is relatively simple and doesn't capture fast flowing ice streams or calving in great detail. Moore et al. (2010) do not use an ice sheet model, but a linear model to model sea level rise using radiative forcing. Applegate and Keller (2015) include more feedbacks than the previous studies but also uses a simple ice sheet model.*

227-228: Specify by 2100 – much more sea level rise beyond this even on low pathways.

*This has been specified.*

230-231: Recent research from Li et al (2023) [<https://www.nature.com/articles/s41586-023-05762-w>] would be a good reference inclusion here.

*This has now been added.*

232: "currently driven" – air temperature could become more important in future, depending on circulation changes.

*This has been amended*

238: East Antarctica is conventionally split in to marine basins and land-based, as they face different dynamics that lead to quite different tipping thresholds and timescales.

*We have not split up East Antarctica specifically here to keep the section shorter. A little more detail is given on the marine basins of East Antarctica being affected by marine ice sheet instability. Land based tipping points of East Antarctic are not discussed here again to shorten the section as generally it is quite stable and the threshold is high for a tipping point.*

240-243: This sentence is a bit convoluted to me, consider rearranging.

*This has been reworded*

251-252: Missing here is the sense of where the tipping point might be, which is generally the point at which retreating grounding line reaches main retrograde slope leading to accelerating discharge (subject to buttressing, pinning, etc.).

*We have clarified where the tipping point is within the MISI mechanism.*

276-278: Probably a bit higher warming needed for East Antarctic basins than WAIS based on e.g. Garbe et al. 2020 (more like 3-6C for Wilkes land for example, though I'd agree the risk starts growing from 2C).

*We have clarified this to say that 2C is for West Antarctica and that East Antarctica is more like 3C+*

287: A key reference on issues around MICI is Edwards et al 2019  
[\[https://doi.org/10.1038/s41586-019-0901-4\]](https://doi.org/10.1038/s41586-019-0901-4)

*This has been added.*

290: Clearer to say "both are preceded by" ice shelf disintegration.

*This has been edited to say the above.*

209: 32cm sea level rise by when? It would also be useful to put these values in context by stating WAIS total sea level equivalent (3+m) earlier.

*We have added some context earlier to give WAIS's total sea level equivalent, but the line referencing the 32cm sea level rise has been removed due to restructuring and shortening of the section.*

308: Given e.g. Goddard et al. 2023 is discussed below and there are some systems with fewer studies, "relatively few" seems more accurate now. Another recent release to consider in this section too is Sutter et al. (2023)  
[\[https://www.nature.com/articles/s41558-023-01738-w\]](https://www.nature.com/articles/s41558-023-01738-w).

*This has been amended and Sutter et al added.*

309-310: Presumably this result is specific to surface air temperature – useful to specify this in context of limited short to medium term impact on ocean warming.

*Yes, is specific to surface air temperature, this has been clarified in the text. The fact that cooling surface air temperatures does not have a large impact on the ocean in the short to mid term (ocean inertia) is discussed in this subsection.*

326: Garbe et al. (2020) is not specifically a CDR experiment – might need to rephrase above for clarity.

*This has been rephrased and moved earlier in the subsection, as part of a shortening of this section to reduce the content on CDR, as it is not the focus of the paper.*

329: True, but how close it recovers by present day levels depends on experiment type (equilibrium vs “quasi-static”). Also, do you mean current warming of ~1.2C or pre-industrial by present levels?

*We have cut most of the CDR section to shorten as these experiments are not the main focus, but agree that recovery does depend on equilibrium vs quasi static experiments. Though both experiments show the ice sheet can't recover to present day, it is worse under quasi static than under equilibrium.*

334-335: Feels like this should be discussed earlier in this subsection given it's such a critical point, before moving on to what changing SAT might be able to do as a second-order driver and then what reversal/CDR studies show.

*Agreed, this has been moved to the first paragraph of the subsection.*

358-359: Could probably do with a little more detail on and beyond melt-elevation and melt-albedo feedbacks here (these two can signpost back to ice sheets for more info), e.g. role of changing snow patterns and black carbon/dust on albedo, thermokarst interaction, slope instabilities, negative feedbacks from retreat to higher altitudes or debris insulation, etc., as well as that unlike ice sheets these feedbacks happen on a largely local to regional scale.

*We have included the point that due to feedbacks happening on a more local scale, glaciers are more sensitive to climatic changes and have additional smaller scale drivers. We have also added in information on black carbon/dust when we discuss the melt albedo feedback in the Greenland section. We have not gone into detail on these smaller scale processes given limited space, and because many of these are small-scale processes that have a more limited impact on the glacier as a whole, and can differ widely between glacier regions. We are more focused on the large-scale. We have chosen not to include retreat to higher altitudes as a negative feedback as though it can stop the glacier from retreating any further, it doesn't necessarily lead to glacier readvance. Additionally, usually retreat would have to be quite substantial to reach*



*altitudes high enough for warming from climate change to not be the dominant influencer.*

368-369: Are G3 and G4 defined before this point (for readers not familiar with GeoMIP terminology or context)?

*G3 and G4 are not defined before this point and so we have briefly defined them here.*

375-377: A Himalayan example is given here, but can anything be said so far about how heterogeneous SRM precipitation impacts may affect different glacier regions, e.g. from GeoMIP? If not, then can be explicit in that.

*We have explicitly said that there does not appear to be any studies beyond the Himalayan region.*

397: SAM not defined before now.

*This has now been defined.*

422: Specify what sort of temperature, e.g. surface air, sea surface, regional/global etc.

*Edited to be more precise. Sentence now reads: "On decadal time-scales, Arctic sea-ice area has declined linearly with the increase in global mean temperature over the satellite period in all months (Notz and Stroeve, 2018) and climate models project a continuation of this relationship over the 21st century (Niederrenk and Notz, 2018)"*

447-448: Could clarify here that while some positive feedbacks exist that have been suggested could drive tipping dynamics (e.g. <https://link.springer.com/article/10.1007/s10584-011-0126-5>; <https://journals.ametsoc.org/view/journals/clim/34/11/JCLI-D-20-0558.1.xml>) the explanation given here is generally more favoured.

*Agreed, we have added reference to Hankel and Tziperman (2021) here.*

476-479: Presumably this is relative to a scenario of continued warming without SRM, rather than versus no further warming in above example? (otherwise this statement could be seen as conflicting with a reduction in March extent above.)

*Yes, we have added the phrase "relative to the background warming scenario without SRM" here to clarify this.*

485: Missing "which" after citation

*This has now been edited.*

498-500: I think this could do with clarification - compared with continued warming on same emissions pathway but without SRM?

*Agreed, and clarification added. Sentence now reads: "Additionally, there has been little work (Ridley and Blockley (2018) is a notable exception), assessing the different impact of SRM versus avoided emissions on Arctic and Antarctic climate and sea ice under SRM, at a given global mean temperature. Such assessments would aid in making a fully quantitative statement on the effectiveness of different SRM strategies for sea-ice restoration (Duffey et al., 2023)."*

512: Clarify as (presumably) soil temperature.

*The value, from Biskaborn et al. (2019), refers to the permafrost temperature at the depth where there is zero mean annual amplitude in temperature (defined as  $<0.1^{\circ}\text{C}$ ), as measured in boreholes. We have cut this sentence from the paragraph as distracting from the main message.*

523: Perhaps useful to clarify this as melt of ice blocks/wedges, and add thermokarst/talik development (which is not necessarily ice melt dependent).

*Agreed. We have expanded this sentence to give a broader explanation, as below: "...to abrupt thaw, which refers to deep thaw occurring on rapid timescales of days to several years due to processes such as the physical collapse of the surface caused by ice melt and the formation of thermokarst lakes (Turetsky et al., 2020; Schuur et al., 2015)."*

536: Perhaps worth clarifying that in AM22 this was an additional threshold beyond the more general (and higher confidence) widespread localised abrupt thaw above  $\sim 1.5^{\circ}\text{C}$ .

*Additional sentence added to clarify this: "This potential global tipping point is in addition to the widespread occurrence of localised abrupt thaw which could occur at warming above approximately  $1.5^{\circ}\text{C}$  (Armstrong McKay et al., 2022)"*

549: Missing in this section (reflecting the point made under further research) is a discussion of how current generation models don't capture non-gradual thaw processes, so currently these conclusions primarily relate to gradual, non-tipping thaw only, or how changes in e.g. precipitation interact with abrupt thaw or eco-hydrological processes.

*Sentence added to highlight this point at the start of the 'further research' section. "The permafrost response in ESMs does not include the feedback processes leading to abrupt thaw and local tipping behaviour (Turetsky et al., 2020), so the quantitative assessments above principally apply to the gradual thaw component; further development of ESMs to include such processes would allow more robust quantitative assessment of the impact of SRM (Lee et al., 2023)."*

580-581: SRM is also unlikely to reverse abrupt thaw processes like thermokarst/talik development once started, but can limit formation of new taliks.

Sentence added to reflect this, above (after 578 of first submission): “Similarly, while SRM might reduce the onset of localised abrupt thaw processes, it would be unlikely to reverse these processes once begun.”

604: Could specify very long timescales is necessary because of the centennial-millennial timescale of ocean heat uptake and circulation.

*We have added this specification as suggested. The sentence now reads: “The reduction in surface temperature under SRM, if maintained over the very long (multi-centennial) timescale of deep-ocean heat uptake.”*

616: A useful figure, but why no equivalent for cryosphere or biosphere systems? A generic schematic showing e.g. elevation/albedo feedbacks might help illustrate key feedbacks there. There could also more focus specifically on how SRM might intervene in those feedbacks to make figures more specific to this article (rather than textbook-style background).

*We have added the effect of global warming, and effect of SAI on drivers.*

622: Deep convection should also be marked in Southern Ocean, as it's not separate to sinking there.

*This has been done.*

628: Might need to clarify deep convection/sinking, which is illustrated separately in figure but are really part and parcel (with "sinking" a simplification of deep convection).

*As shown by Katsman in several papers, convection is not the same as (net) sinking: Convection being a mixing process with some water parcels moving up and some down, close to each other, but no net movement, whereas sinking is understood as the net downward movement of water. Sinking requires the proximity of a coast to break geostrophic balance (see also Spall 2001), as opposed to (deep) convection which can take place in the interior. Therefore we depict them as separate processes, also in the figure.*

640-641: Relevant here is the IPCC's assessment of collapse unlikely before 2100, but also that CMIP models are biased towards stability and lack key aspects (e.g. ice sheet meltwater) that likely lead to under-estimates of weakening and collapse. This is why unrealistic hosing is used in some studies (like Jackson et al. 2023 below) to overcome this tendency. This is mentioned in next paragraph, but think it's useful context within this paragraph.

*This paragraph has now been moved to the supplement, so we feel repeating the context there is likely no longer relevant, as the reader of the supplement is likely to have read the paper (and thus the mentioning of this) before reading the supplement.*

652: Jackson et al. 2022 is the preprint, can update to final 2023 paper now.

*Thank you, corrected.*

660: Liu et al 2017 relevant here too  
[\[https://www.science.org/doi/10.1126/sciadv.1601666\]](https://www.science.org/doi/10.1126/sciadv.1601666)

*Thank you, reference added.*

662: Another angle beyond palaeo and model evidence not covered here is observations, with the debate over current slowdown (with IPCC AR6 having low confidence in some weakening) and of potential early warning signals suggestive of destabilisation [e.g. <https://www.nature.com/articles/s41558-021-01097-4>;  
<https://www.nature.com/articles/s41467-022-32704-3>;  
<https://www.nature.com/articles/s41467-023-39810-w>]

*Good point, we included some studies on observational evidence - however, also some studies which criticise some of the papers mentioned here. The part ended up in the supplement.*

677-678: Ice sheet runoff is quite the important missing factor though, which is missing from most ESM simulations of AMOC weakening/collapse (and therefore SRM studies using those too).

*A study on the effect of ice melt on AMOC weakening was already mentioned a few lines further down. We have added a sentence to mention that ice melt could also increase tipping probability.*

700: One way of exploring possible SRM effects on AMOC would be to explore the role of past/current aerosol emission effects on AMOC, which have been suggested to generally reduce AMOC tipping likelihood (and is being partly reversed over North Atlantic over recent years) and so could effectively be a smaller-scale SRM analogue.

*One paper doing this is mentioned in the next paragraph already (Hassan et al). We expanded this comment to clarify that according to that paper aerosol forcing indeed contributed to AMOC ( $\approx 1.5\text{Sv}$ ).*

705: There's a question mark over whether precip changes from SRM would help or hinder though (though admittedly it seems to be a small factor, model limitations permitting).

*We have now clarified this in a rewritten section on the impact SRM on drivers, that 1) it seems as if the impact of SRM on precip - evap is helpful (i.e. less freshening; see Xie et al., 2022) and 2) precip-evap is not the dominant factor.*

721-723: This is a key point, and relates to my general comment on uncertainty inherent in using models with limited tipping dynamics representation to project SRM effects on CTPs.

*Thanks for the remark. No direct action taken at this point of the text.*

728-729: This is a very good point, and may be applicable to a other tipping points too, as while many have generic warming level thresholds estimated several are likely to have rate-dependent too [e.g. Ritchie et al. 2023 <https://esd.copernicus.org/articles/14/669/2023/>]. Could be something to highlight need for further study of in discussion.

*Thanks for the remark. No direct action taken at this point of the text.*

733-738: This paragraph largely repeats previous one.

*Agreed, duplication was removed.*

748-749: Indeed – a subset of this risk is that if SRM was initiated to protect the AMOC but it turns out tipping has already commenced (as exactly when thresholds are crossed is uncertain and there's a time lag in tipping dynamics) then SRM might have to be phased down or out to avoid over-cooling North Atlantic region, but at potential cost of unprotecting other regions and CTPs. Relates to potential tricky balancing of how to target mitigating multiple CTPs and other climate impacts without worsening some over others.

*This is an interesting point and a brief remark has been added.*

761: Missing parenthesis after “injection points”.

*This has been corrected.*

808: Given similar issues to AMOC could merge with further research there for a clearer structure, in a similar way to how land ice further research is grouped together.

*We have decided not to merge as it seemed to overcomplicated things. However, we have referred to AMOC section for overlapping matters and treated here only the non-overlapping ones*

823: Missing fullstop before citation?

*Indeed, thank you.*

831: Relevant here is new paper Li et al (2023) [<https://www.nature.com/articles/s41586-023-05762-w>] which projects strong weakening with further warming (RCP8.5 in that study, but likely similar magnitude decline for RCP4.5 on longer timescales)

*Indeed this paper is very useful and has been added.*

834: Sentence would be clearer if what the mechanism is for is specified (overturning weakening? collapse?)

*Corrected (note: the whole paragraph has now been rewritten)*

839: Contrast Li et al, who suggest wind has marginal effect on projected weakening (though possibly model dependent).

*Li et al is now discussed.*

862: Only marine stratocumulus clouds are tackled in this section, and not e.g. monsoons which are sometimes considered atmospheric TPs, though possibly more due to aerosols than climate change proper. Given the relation of monsoon tipping to aerosols, and recent work on interhemispheric AOD difference as a key safe boundary (Rockström et al. 2023), their relation to SRM would be an interesting avenue to explore if resources permit.

*Given the complexity of this topic, doubts about whether it constitutes an atmospheric tipping point, and most importantly limited space, we decided to exclude monsoons from this paper. As mentioned elsewhere, this paper is not a comprehensive review of all possible tipping elements, but just a diverse range that we thought may be considered useful.*

894: Warming values repeated from past paragraph (not bad, but unnecessary to make hysteresis point).

*The reference to specific values has been removed and the sentences rephrased.*

920: What does this mean - the feedback is fully counteracted, or literally turned off?

*The text now clarifies that this is a highly idealized model and that this feedback was literally turned off in the model.*

948: This general intro to ecosystem TPs & SRM is useful in general, but is repetitive in parts and could be tightened.

*The introduction has been clarified in places and shortened.*

953-954: In my experience extinction is not normally thought of as a TP / regime shift in ecology (although extinction or replacement of a keystone species could help trigger a wider regime shift).

*In the ecological and evolutionary literature, rapid population loss can constitute a tipping point (eg <https://doi.org/10.1111/evo.13374>). Whilst it is true that the scale is not that of an earth system tipping element (and we have clarified that we do only focus on the system level, and so won't be focusing on the more micro-scale tipping elements), we have kept a brief mention of this to highlight the difference in language use in the fields. We understand how the inclusion and current phrasing could cause confusion, and we hope that our clarification that "the ecological literature refers to tipping points not only with respect to such changes at the system level (which we focus on here), but also in to the point at which the extinction of an individual species becomes inevitable (e.g.*

*Osmond and Klausmeier 2017).” is useful. Of course, we also agree with the reviewer that wider systemic tipping can also be initiated by such extinction.*

965-967: Clarify – the impact/event itself was not a TP (just an abrupt exogenous forcing with an equally abrupt response), but it likely drove many localised/regionalised ecosystem regime shifts (some but not all of which might have featured self-sustaining tipping dynamics).

*This has been clarified, the original wording was sloppy language.*

1010-1013: This sentence can be simplified for clarity.

*Rewritten to clarify the meaning. More sloppy language, sadly, but hopefully better now.*

1024: To me this is conceptually confused – "forests" and "biodiversity" are very different categories of things (one a collection of objects forming a system, the other a property of such a system).

*Thank you for pointing this out, it has now been deleted.*

1025-1030: These sentences are a bit confusing and could do with tightening.

*Thank you, these sentences have now been shortened and rewritten.*

1051-1052: I'd like to see more evidence presented on how these forests are susceptible to tipping (via regeneration failure) that justifies pulling it out as a specific unit to analyse. In analyses of tropical rainforest-rainfall feedbacks, rainforests in maritime Southeast Asia are normally found to be more robust due to plentiful ocean rainfall sources, so it can't be that mechanism, and synchronised seeding occurs in many forest biomes, particularly tropical but including to some extent temperate too. Numata et al. is a key citation here, but it's not apparent that regime shifts per se are projected in that study. An alternative would be to merge in with discussion of other tropical forests.

*This section has been moved to the Supplement, and the text modified. Failure of a foundational/keystone/dominant group of species due to climate change would be likely to result in a fundamental state change of the system, although data are admittedly limited. While these forests may be robust to some climate changes, the massive deforestation, increased fires, and other harms may make them more susceptible to climate-induced tipping. We agree that the evidence is limited, but think these highly diverse and less well recognized systems should gain attention, and therefore hope to retain this in the Supplement.*

1073-1075: I couldn't find this in the given reference.

*This has been added*

1078: Clarify where.

*This sentence has been revised to: SRM is predicted to reduce global mean temperatures and create drier conditions (MacMartin et al., 2016) including in southeast Asia (Tan et al. 2023).*

1082-1083: Assumes there is a TP in this system – if this is uncertain though could reframe this section as about protecting a particular biome that may or may not feature tipping dynamics (but then a question is why this ecosystem and not various others).

*We have followed this suggestion and moved this to the supplement, as well as briefly discussed it with regards to tropical forests more generally. We picked this biome because it is under explored and may (or may not) have unique sensitivity for tipping, and hoped to highlight that it may be possible to have some knowledge of the impact of SRM on systems that may or may not tip, even if tipping is not known (such knowledge may be much harder to get if we were just reliant on models).*

1086: Missing a "Further Research" subheading here?

*We have added this*

1097: This surprises me, as Amazon is normally considered to be one of the most biodiverse biomes (when considered as a biome unit). The cited analysis doesn't highlight Amazon because the "hotspots" are a product both of endemism and threat level, with Amazonia seemingly left out because of lower threat rather than lower endemism (i.e. hotspots in Myers et al 2000 don't mean that's where most biodiversity is, but where areas of high biodiversity are most threatened – it also excludes invertebrates, and any newly identified species in past 23 years). Also, this citation is not in the reference list (I'm not sure it adds too much to discussion anyway).

*We agree with the reviewer and have removed it as it is tangential.*

1101-1102: 2-6C is for just climate change without anthropogenic co-drivers like deforestation – including those could lower it further.

*Text modified to make this point.*

1104: More recent studies highlight that degraded forest is a likely alternative state (possibly more common than savannah).

*Agree. We have rephrased this part: "...might force a tipping point for the Amazon basin to the replacement of tropical forest with systems without trees or with fewer, scattered trees and without continuous canopies." to cover both degraded forest state and savannah-like non-forest state.*



1123-1124: Some discussion of where dieback is more likely – in the drier south and east, as per bistable areas in Staal et al. 2020 – would be useful too for understanding the feedbacks and areas most at risk.

*Thanks for the suggestion. We have added this sentence and the reference: “Staal et al. 2020 further delineated a bistable state of forests in the southern Amazon, which are most susceptible to the drought-dieback feedback loop that would tip these forests to savanna-like nonforested state.”*

1143: Could make a link here to AMOC collapse too, which is projected to shift ITCZ southwards and so cause drying in Northern Amazonia (likely similar to in Younger Dryas). Also some link to monsoon shifts and global aerosol patterns.

*Thanks for the suggestion, but recent work has suggested the possibility of the opposite outcome: A potential collapse of AMOC would stabilise eastern Amazonian rainforests by increasing rainfall and decreasing temperature in most parts of the Amazon (e.g. Da Nian et al. 2023). This may reflect the difficulty of GCMs in predicting regional climate responses of the Amazon. We think it is helpful to mention potential competing/controversial effects of climate change and SRM on the tipping dynamics of the Amazon: “Although the most direct drivers of potential tipping dynamics in the Amazon is due to climate change, some changes in oceanic and atmospheric circulations could also have indirect, beneficial effects on the resilience of Amazon forests. For example, the possible AMOC collapse with elevated warming (see section 3.1) is projected to shift the Intertropical Convergence Zone southwards (Orihuela-Pinto et al. 2022) and cause increased rainfall and decreased temperature in most parts of the Amazon, which would stabilise eastern Amazonian rainforests (Da Nian et al. 2023) by mitigating the above-mentioned drought-dieback feedback loop. Although large uncertainties exist in regional climate predictions, potential competing effects of SRM on the Amazon forests are foreseen due to the complex roles of reduced global warming and prevented AMOC collapse in the regional climate of the Amazon, which warrants further studies.”*

1150-1151: Even here GCMs often struggle to agree on even the sign of regional precip change, which is one of the reasons ESMs tend to disagree on likelihood and scale of Amazon dieback.

*Agree. We have rephrased this sentence to make this point and also mentioned large uncertainties in regional climate predictions in the Amazon elsewhere.*

1165: "the utility... is of limited utility" – rephrase to e.g. "Thus, existing studies...".

*This has been rephrased.*

1194: I think representing land use change, and spatial heterogeneity in plant traits adaptivity across the Amazon is also key for better model representation.

*We agree with the reviewer and have added this.*

1205-1206: This probably needs a citation [e.g. <https://journals.plos.org/plosone/article?id=10.1371/journal.pone.0025026>]

*Thank you, this has been added*

1249: Critical too in some regions like the Caribbean is disease and invasive species spread (often facilitated by warming and globalised trade).

*We agree and have added a sentence about this: "Moreover, diseases (Alvarez-Filip 2022) and invasive species (Pettay et al. 2015), often associated with warming and global trade, also have negative impacts on the structure, functioning and stability of coral reefs such as those found in the Caribbean."*

1268: Some numbers here would be useful to demonstrate this if possible.

*Rephrased and a citation is added to show the cancellation effects between direct and diffuse radiation changes induced by SRM*

1278: Recurrence in between hurricanes?

Yes

1291: While the basis for SRM effects on coral bleaching is better understood than for some tipping systems, given the fair few uncertainties explored above relating e.g. to extreme events, complex co-drivers, or variation in SRM impacts between different coral regions makes it seem not quite so strong to me. Not a huge amount of dedicated studies are cited above either. Personally I'd like to see studies with up-to-date ESMS exploring where and how much SRM is necessary to e.g. keep below specific Degree Heating Week or recurrence thresholds, how this affects storms, and the spatial heterogeneity of these.

*We mostly agree with the reviewer, although do think it is useful to contrast the degree of knowledge we have around coral reefs (where we can have decent certainty that SRM would to some degree reduce tipping) compared to most other systems in the biosphere, where our uncertainty is far larger. Nonetheless, we have added words to the effect that the reviewer has suggested, as we do agree more research could be useful.*

1303-1304: Are these are all vulnerable to tipping? Not all ecosystems have alternative stable states to tip to – they can just become gradually degraded – so it's important to present or cite evidence for self-sustaining regime shifts. The Sundarbans are the clearest example here, with coastal erosion and salinity effects likely to drive tipping dynamic across mangrove biome (GTPR, 2023), but given they're at risk of regime shifts across the tropics why is this the only locality discussed?

*Permanent state change to a "degraded" system, with different dominant functional types of vegetation, fragmented and populated by invasive species, is a common stable end point of state change in many ecological systems. We believe that this change to a profoundly different, stable state fits the definition and concept of a tipping point to an*

*alternative stable state. However, we do except your criticism that we don't highlight what this stable alternative system is, partially because there has been little study of what we now refer to as the HTS in the context of tipping, so the literature base to make such judgements on are rather limited. A rationale for discussing the Sundarbans as part of a larger, integrated Earth System tipping element (the HTS), is discussed earlier in this response, and we hope that justification is satisfactory. Because mangroves are globally dispersed and affected by many factors, focusing on the largest and most diverse such system as an example seems useful to us, just as we and others use the Amazon as a critically important example and do not just discuss all tropical forests as a single Earth System tipping element.*

1311: Here as in above in text?

*We have clarified we were referring to the mountain glaciers section.*

1315-1317: Maybe better discussed in SRM effects subsection below?

*We have now moved it to that section*

1329: In other subsections the drivers and mechanisms of a specific tipping system is analysed, while here it's for multiple different systems within the same region, which is somewhat inconsistent in paper structuring. Additionally there's some overlap with other sections, e.g. for glaciers.

*We agree with the reviewer here, and have now reframed the Himalaya-to-Sundarbans (HTS) Hydro-ecological System as a single, integrated system which qualifies (with high uncertainty) as a regional impact tipping element (see responses above). When we now describe the drivers and mechanisms of the HTS tipping system, we consistently refer to the whole HTS system or an integral part of the HTS system. There is very minor overlap with the Mountain Glaciers section, and this example focuses on the hydroecological aspect, especially the ecological, agricultural, and human systems that depend on the glacier water and monsoon. We believe all other ecological tipping elements such as the Amazon forests and the tropical coral reefs are of similar complexity, involving different subsystems within the whole system.*

1334-1336: Specify what system this tipping point is in – downstream ecosystems? Peri-glacial environment around glaciers?

*We have specified the immediate area below the glaciers as well as the downstream Ganges-Brahmaputra-Meghna basin that are subject to tipping driven by Glacial melting.*

1343-1353: This paragraph reads rather fragmented to me. Additionally, I don't think the TPs on line 1345-1346 have been explicitly described yet.

*We have largely revised this paragraph of section 5.4.2 The impacts of SRM to make it clearer. We have also added a few sentences and references regarding specific numbers of tipping points (in terms of degC warming) related to extreme heat and glacier melting specific to the HTS region. We cannot however find specific numbers of tipping*

*points for all subsystems in the HTS due to the scarcity of research establishing this unique system as a tipping element (which is one reason we introduce it to increase awareness and stimulate further research).*

1374-1378: Possibly worth noting that this hypothesis (or at least magnitude of effect) is debated.

*Agree, we have revised this part to make the point: An intriguing but hotly debated hypothesis has suggested that the extinction of large mammals (e.g. woolly mammoths) was a tipping point in the most recent glacial maxima in which their grazing maintained grasslands which had higher albedo than the coniferous forests, resulting in global cooling because the extent of these systems is so great; other controversial suggestions includes wildlife restoration as a way to reverse that tipping point (Zimov, 2005; Schmitz and Sylvén, 2023).*

1388-1390: Worth noting that biogeophysical effects can have opposite regional climate impacts to the global climate effect (which could potentially interact with SRM) – e.g. boreal dieback to steppe increasing albedo and regional cooling, versus carbon released by dieback increasing global warming.

*This has now been noted in the text.*

1394: Given complex eco-hydrological mechanisms in boreal forest dynamics this subsection could do with mention of how (likely uncertain) impacts of SRM on precip might complicate temperature-based considerations.

*Thanks for this comment. We have added in the end of this paragraph: “Furthermore, given complex eco-hydrological mechanisms in boreal forest dynamics, the large uncertainty in simulated regional precipitation changes under SRM might complicate the above temperature-driven mechanisms of tipping dynamics (see more discussions on this aspect in Sections 1.1 and 5.2).”*

1403: It seems that there's no specific SRM studies re. boreal forests – if so, should highlight that as a knowledge gap.

*The text has been edited to include this.*

1417-1422: Minor point, but not sure these sentences are necessary as they mostly repeat the Introduction.

*This has now been mostly removed to avoid repetition.*

1426-1428: Useful point to mention –potentially relevant to highlight in abstract.

*We have changed some of the abstract to highlight the limitations of the method, suggesting that “ we give first-order indications of the impact of SRM.” to highlight the point made here.*

Table 1:

*We have significantly edited table 1. It now has 4 columns. The 1st column contains the name of the tipping element. The second has the 'effect of SRM on drivers' where we decompose the impact of SRM on each of the drivers, and contain our overall judgement (and a representation of our uncertainty) of the impact of SRM on the drivers overall (ie how useful may SRM be in preventing tipping). The third column contains a description of SRM's ability to reverse tipping once tipping has started but before the system is in a stable alternative state. Finally, we have a column commenting on the strength of the evidence base.*

Is b) in the 4th column linked to a specific timescale? GrIS, AIS, and permafrost here are Not Reversible by SAI once tipping is complete, which is true on centennial timescales but not necessarily very long timescales, while AMOC collapse is Yes with hysteresis, when on long enough timescales that could apply to the former examples too. I'm also not entirely sure if AMOC/SPG collapse can likely be reversed once tipping has begun (depends on feedback dynamics, which we don't have a great hold on right now). Also, is "Uncertain" in last row 4th column for both a and b?

*We have clarified what we mean by reversal now in the introduction, using a diagram. Essentially, we are using the term reversal to mean reversing tipping once self-perpetuating feedbacks have started but (considerably before) tipping is completed, and don't discuss reversal once it has entered into a second stable state, due to the fact that timescales are simply too long. Exactly where the line between these two meanings of reversal falls is fuzzy, but we don't deem such ambiguity as such a vital problem, particularly when there is so much uncertainty over other factors anyway.*

1441-1442:                These partial compensations are mostly with regards to temperature though – I would hazard that greater uncertainty / lower confidence would hold on this partial compensation once accounting for impacts on other climate factors such as precipitation. At the moment the Discussion and Table 1 doesn't highlight this.

*The edits to table 1 make this clearer, and we have added a little more discussion on this as well. We now decompose table 1 into the impact of SRM on each of the individual drivers (this should also now be discussed in each relevant section), as well as an overall judgement with a sense of uncertainty. We also have a column on strength of evidence, which may also be useful at stressing this point. Whilst it is true that the partial compensation is mostly with regards to temperature, or with regards to those tipping elements that are closely coupled to temperature (and particularly to those that are less strongly related to local precipitation), this is a large number of tipping elements evaluated. We have added in more discussion to clarify the nuances, and we hope this, combined with the edited table, would be sufficient.*

1444-1447:                These points are repeated two paragraphs down.

*This has now been edited to remove the repetition.*

1445: I don't think peak-shaving hasn't been mentioned prior to this point, so could do with an explanatory citation on first instance.

*We have now mentioned it in the introduction.*

1449-1453: This overlaps discussion of emergency use and hysteresis in paragraph below – could probably tighten discussion to be more concise.

*This has been tightened.*

1475: Could specify biosphere/ecosystem TPs here (e.g. biomass plantation based CDR making forest dieback or savannah degradation more likely).

*This has been done.*

1477: A key issue and source of uncertainty for me is that we know most about how SRM might effect CTPs via temperature, but much less about other climatic factors like precipitation, which in many cases could reduce or even overwhelm the compensation delivered by reducing warming (e.g. less precip delivered to ice sheets, or cooling accompanied by droughts in tropical forests). This relates to the research approaches given below – improving modelling of Earth system tipping dynamics is critical to be able to give a fuller assessment of how different SRM schemes might affect tipping processes.

*We essentially agree here, and agree improved modelling of Earth system tipping dynamics is critical, and have clarified this. However, we don't want to downplay our knowledge either, and want to keep the discussion of uncertainty symmetrical (just as the uncertainty over precipitation may make compensation less effective, it also could make it more effective). At present, beyond a brief mention of this justification (which has now been mentioned elsewhere as well), we do not believe any more discussion of this is needed in 6.1*

1478-1481: This is not very clear to me at present – is this saying that these Qs wouldn't be relevant to people who think SRM research shouldn't be pursued at all because of moral hazard issues, or more the issues raised in the penultimate paragraph?

*This paragraph has mostly been removed, and replaced with a statement of the idea that tipping and other physical impacts are not the only relevant factor to take into consideration when carrying out an assessment of SRM and SRM-related research.*
